# Supplementary material
Source: publisher figshare collection journal article supplement (https://acs.figshare.com/ndownloader/files/5751033)
Supplement: Supplementary file 1 [file 5751033]

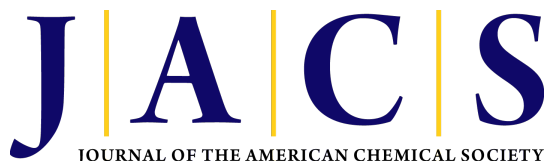

J | A | C | S  
JOURNAL OF THE AMERICAN CHEMICAL SOCIETY

J. Am. Chem. Soc., 1996, 118(43), 10571-10576, DOI: [10.1021/ja9613973](https://doi.org/10.1021/ja9613973)

#### Terms & Conditions

Electronic Supporting Information files are available without a subscription to ACS Web Editions. The American Chemical Society holds a copyright ownership interest in any copyrightable Supporting Information. Files available from the ACS website may be downloaded for personal use only. Users are not otherwise permitted to reproduce, republish, redistribute, or sell any Supporting Information from the ACS website, either in whole or in part, in either machine-readable form or any other form without permission from the American Chemical Society. For permission to reproduce, republish and redistribute this material, requesters must process their own requests via the RightsLink permission system. Information about how to use the RightsLink permission system can be found at <http://pubs.acs.org/page/copyright/permissions.html>

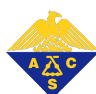

ACS Publications

MOST TRUSTED. MOST CITED. MOST READ.

Copyright © 1996 American Chemical Society

**Table S1.** Calculated Total Energies (Hartrees)

|                   |                       | Sym             | State                         | UHF <sup>a</sup> | PMP4 <sup>b</sup> | G2(MP2,SVP)<br>0 K <sup>c</sup> | G2(MP2,SVP)<br>298 K <sup>c</sup> |
|-------------------|-----------------------|-----------------|-------------------------------|------------------|-------------------|---------------------------------|-----------------------------------|
| <u>Components</u> |                       |                 |                               |                  |                   |                                 |                                   |
| 1                 | Cl                    | K <sub>h</sub>  | <sup>2</sup> P                | -459.44796       | -459.57027        | -459.66759                      | -459.66520                        |
| 2                 | CH <sub>3</sub>       | D <sub>3h</sub> | <sup>2</sup> A <sub>2</sub> " | -39.55899        | -39.69057         | -39.74215                       | -39.73790                         |
| 3                 | NH <sub>3</sub>       | C <sub>3v</sub> | <sup>1</sup> A <sub>1</sub>   | -56.18436        | -56.37126         | -56.45667                       | -56.45286                         |
| 4                 | NMe <sub>3</sub>      | C <sub>3v</sub> | <sup>1</sup> A <sub>1</sub>   | -173.26930       | -173.89366        | -174.09622                      | -174.08974                        |
| 5                 | NCl <sub>3</sub>      | C <sub>3v</sub> | <sup>1</sup> A <sub>1</sub>   | -1432.73551      | -1433.36450       | -1433.75673                     | -1433.75132                       |
| 6                 | HN=CH <sub>2</sub>    | C <sub>s</sub>  | <sup>1</sup> A'               | -94.02846        | -94.34554         | -94.46083                       | -94.45696                         |
| 7                 | HN-CH <sub>2</sub>    | C <sub>s</sub>  | <sup>3</sup> A"               | -93.96268        | -94.23644         | -94.34960                       | -94.34546                         |
| 8                 | pyridine              | C <sub>2v</sub> | <sup>1</sup> A <sub>1</sub>   | -246.69582       | -247.55302        | -247.81777                      | -247.81247                        |
| 9                 | pyridine              | C <sub>s</sub>  | <sup>3</sup> A'               | -246.59325       | -247.40072        | -247.67627                      | -247.67016                        |
| <u>Cl-adducts</u> |                       |                 |                               |                  |                   |                                 |                                   |
| 10                | ClNH <sub>3</sub>     | C <sub>3v</sub> | <sup>2</sup> A <sub>1</sub>   | -515.63874       | -515.95733        | -516.13808                      | -516.13253                        |
| 11                | ClNMe <sub>3</sub>    | C <sub>3v</sub> | <sup>2</sup> A <sub>1</sub>   | -632.72759       | -633.49478        | -633.79817                      | -633.78982                        |
| 12                | ClNCl <sub>3</sub>    | C <sub>3v</sub> | <sup>2</sup> A <sub>1</sub>   | -1892.18460      | -1892.93953       | -1893.43232                     | -1893.42425                       |
| 13a               | ClNH=CH <sub>2</sub>  | C <sub>s</sub>  | <sup>2</sup> A'               | -553.48102       | -553.92558        | -554.14040                      | -554.13426                        |
| 13b               | ClNH-CH <sub>2</sub>  | C <sub>1</sub>  | <sup>2</sup> A                | -553.44396       | -553.89406        | -554.11701                      | -554.11199                        |
| 14                | N-chloropyridinyl     | C <sub>2v</sub> | <sup>2</sup> A <sub>1</sub>   | -706.14836       | -707.13953        | -707.50347                      | -707.49563                        |
| <u>Me-adducts</u> |                       |                 |                               |                  |                   |                                 |                                   |
| 15                | MeNH-CH <sub>2</sub>  | C <sub>1</sub>  | <sup>2</sup> A                | -133.61524       | -134.06753        | -134.22925                      | -134.22385                        |
| 16                | MeCH <sub>2</sub> -NH | C <sub>s</sub>  | <sup>2</sup> A"               | -133.63012       | -134.07468        | -134.23058                      | -134.22526                        |
| 17                | N-methylpyridinyl     | C <sub>s</sub>  | <sup>2</sup> A'               | -286.26892       | -287.25931        | -287.57952                      | -287.57187                        |
| 18                | 4-methylpyridinyl     | C <sub>s</sub>  | <sup>2</sup> A'               | -286.27863       | -287.26221        | -287.57214                      | -287.56463                        |

<sup>a</sup> UHF/6-31G(d) total energies at the UHF/6-31G(d) optimized geometries.<sup>b</sup> PMP4/6-31G(d) total energies calculated at the MP2(fc)/6-31G(d) optimized geometries.<sup>c</sup> Calculated at the MP2(full)/6-31G(d) optimized geometries.

**Table S2.** GAUSSIAN Archive Entries for UMP2/(full)6-31G(d) Optimized Geometries for Species 1–18 and UHF/6-31G(d) Frequency Calculations for the 2c–3e Cl Adducts 10–14

## Cl (1)

```
1\1\GINC-RSCQC9\SP\UMP2-FU\6-31G(d)\Cl1(2)\AXN501\09-Feb-1996\0\#MP2=
FULL/6-31G(D)\chlorine atom\0,2\Cl\Version=IBM-RS6000-G94RevC.2\HF=
-459.4479639\MP2=-459.5620568\PUHF=-459.4503696\PMP2-0=-459.5631595\S2
=0.755\S2-1=0.75\S2A=0.75\RMSD=5.367e-09\PG=KH\@
```

CH<sub>3</sub> (2)

```
1\1\GINC-RSCQC2\FOpt\UMP2-FU\6-31G(d)\C1H3(2)\AXN501\16-Jan-1996\0\#N
GEOM=ALLCHECK GUESS=READ MP2(FULL)/6-31G(D) OPT=RCFC\methyl radical,
G2\0,2\C,0.,0.,0.\H,0.,0.,1.078274815\H,0.9338133821,0.,-0.539137407
5\H,-0.9338133821,0.,-0.5391374075\Version=IBM-RS6000-G94RevC.2\HF=-3
9.5589209\MP2=-39.6730311\PUHF=-39.5620213\PMP2-0=-39.6750374\S2=0.762
\S2-1=0.753\S2A=0.75\RMSD=4.447e-09\RMSF=5.067e-05\Dipole=0.,0.,0.\PG=
D03H [O(C1),3C2(H1)]\@
```

NH<sub>3</sub> (3)

```
1\1\ ANU-VP\FOPT\RMP2-FC\6-31G(D)\H3N1\AXN501\5-Nov-1993\1\# MP2=DIRE
CT/6-31G* FOPT SCF=DIRECT GEOM=CHECK\amonia, structure\0,1\N\X,1,1.\
H,1,nh,2,w\H,1,nh,2,w,3,120.,0\H,1,nh,2,w,3,-120.,0\nh=1.0170451\w=11
2.46412835\Version=Fujitsu-VP-Unix-G92RevE.2\HF=-56.1838218\MP2=-56.3
542116\RMSD=9.211e-09\RMSF=7.157e-06\Dipole=0.,0.,-0.7733075\PG=C03V [
C3(N1),3SGV(H1)]\@
```

NMe<sub>3</sub> (4)

```
1\1\GINC-RSCQC9\FOpt\RMP2-FU\6-31G(d)\C3H9N1\AXN501\14-Nov-1995\0\#MP
2=FULL/6-31G* GEOM=CHECK MAXDISK=460000000 FOPT\NMe3 C3v structure\0
,1\N,0.,0.,-0.3965901884\C,1.3780249294,0.,0.065360005\C,-0.6890124647
,1.1934045959,0.065360005\C,-0.6890124647,-1.1934045959,0.065360005\H,
1.460217466,0.,1.1680142209\H,-0.730108733,1.2645854206,1.1680142209\H
,-0.730108733,-1.2645854207,1.1680142209\H,1.8908306394,0.8862250878,-
0.3173985722\H,1.8908306394,-0.8862250878,-0.3173985722\H,-1.712908759
2,1.1943948241,-0.3173985722\H,-0.1779218802,2.0806199119,-0.317398572
2\H,-0.1779218802,-2.0806199119,-0.3173985722\H,-1.7129087592,-1.19439
48241,-0.3173985722\Version=IBM-RS6000-G94RevC.2\HF=-173.2682753\MP2=
-173.846463\RMSD=4.021e-09\RMSF=8.488e-05\Dipole=0.,0.,0.2919384\PG=C0
3V [C3(N1),3SGV(C1H1),X(H6)]\@
```

NCl<sub>3</sub> (5)

```
1\1\GINC-RSCQC8\FOpt\RMP2-FU\6-31G(d)\Cl3N1\AXN501\23-Nov-1995\1\# MP
2=FULL/6-31G* SCF=DIRECT FOPT=Z-MATRIX\nc13\0,1\X\N,1,1.\Cl,2,r1,1,a
1\Cl,2,r1,1,a1,3,120.,0\Cl,2,r1,1,a1,3,240.,0\r1=1.77251457\al=111.25
879799\Version=IBM-RS6000-G94RevC.2\HF=-1432.7320341\MP2=-1433.338309
3\RMSD=3.585e-09\RMSF=3.181e-05\Dipole=0.,0.,0.2773441\PG=C03V [C3(N1)
,3SGV(Cl1)]\@
```

HN=CH<sub>2</sub> (6)

```
1\1\GINC-RSCQC2\FOpt\RMP2-FU\6-31G(d)\C1H3N1\AXN501\25-Oct-1995\1\# M
P2=FULL/6-31G* FOPT=Z-MATRIX SCF=DIRECT\formaldimine HN=CH2 structure
\0,1\C\N,1,r1\H,2,r2,1,a1\H,1,r3,2,a2,3,0.\H,1,r4,2,a3,3,180.,0\r1
=1.28093277\r2=1.02637719\r3=1.09440539\r4=1.08890475\al=109.73928772\
a2=125.46279997\al=118.39289704\Version=IBM-RS6000-G94RevC.2\State=1-
A'\HF=-94.0265361\MP2=-94.3230776\RMSD=3.853e-09\RMSF=5.799e-05\Dipole
=0.5866445,0.,-0.5755192\PG=CS [SG(C1H3N1)]\@
```

HN-CH<sub>2</sub> (7)

1\1\GINC-RSCQC9\FOpt\UMP2-FU\6-31G(d)\C1H3N1(3)\AXN501\26-Oct-1995\0\#\  
 # UMP2=FULL/6-31G\* FOPT SCF=DIRECT FREQ\HN=CH2 triplet structure\0,3  
 \C,-0.0186823585,0.,-0.6605887185\N,-0.0183125131,0.,0.7291787097\H,0.  
 9330448474,0.,1.1176586745\H,-0.3463815523,-0.9246664864,-1.1291886658  
 \H,-0.3463815523,0.9246664864,-1.1291886658\Version=IBM-RS6000-G94Rev  
 C.2\State=3-A\HF=-93.9621921\MP2=-94.2087077\PUHF=-93.9655632\PMP2=0=  
 -94.2105989\S2=2.012\S2-1=2.001\S2A=2.\RMSD=7.609e-09\RMSF=1.281e-04\D  
 ipole=0.4047946,0.,-0.2039806\PG=CS [SG(C1H1N1),X(H2)]\@

#### Pyridine (8)

1\1\GINC-RSCQC8\FOpt\RMP2-FU\6-31G(d)\C5H5N1\ROOT\13-Oct-1995\0\#\# MP2  
 =FULL/6-31G\* FOPT SCF=DIRECT MAXDISK=460000000\Pyridine structure\0,  
 1\N,0.,0.,-1.4249604615\C,0.,0.,1.3861168541\C,1.1440844254,0.,-0.7200  
 886482\C,-1.1440844254,0.,-0.7200886482\C,-1.1961773942,0.,0.672891071  
 6\C,1.1961773942,0.,0.6728910716\H,0.,0.,2.4729370387\H,-2.1550440648,  
 0.,1.1830497012\H,2.1550440648,0.,1.1830497012\H,2.0603848887,0.,-1.30  
 73217082\H,-2.0603848887,0.,-1.3073217082\Version=IBM-RS6000-G94RevC.  
 2\State=1-A1\HF=-246.6937746\MP2=-247.5106788\RMSD=3.377e-09\RMSF=9.61  
 4e-05\Dipole=0.,0.,0.9108545\PG=C02V [C2(H1C1N1),SGV(C4H4)]\@

#### Triplet pyridine (9)

1\1\GINC-RSCQC8\FOpt\UMP2-FU\6-31G(d)\C5H5N1(3)\ROOT\12-Oct-1995\0\#\#  
 MP2=FULL/6-31G\* FOPT SCF=DIRECT MAXDISK=460000000\pyridine 3A' Cs str  
 ucture\0,3\N,-0.5098704728,0.,-1.2429713902\C,-0.5088628585,1.1906119  
 68,-0.5008959001\C,-0.5088628585,-1.190611968,-0.5008959001\C,0.319522  
 1795,1.226685034,0.5400465726\C,0.3195221795,-1.226685034,0.5400465726  
 \C,0.9108237206,0.,0.9986369979\H,-1.0898295236,2.0216945617,-0.883880  
 6613\H,-1.0898295236,-2.0216945617,-0.8838806613\H,0.4881051543,2.1539  
 988986,1.0783864901\H,0.4881051543,-2.1539988986,1.0783864901\H,1.5796  
 878728,0.,1.8501580163\Version=IBM-RS6000-G94RevC.2\State=3-A'\HF=-24  
 6.5898159\MP2=-247.3317331\PUHF=-246.6079186\PMP2=0=-247.347401\S2=2.3  
 09\S2-1=2.219\S2A=2.042\RMSD=2.079e-09\RMSF=8.579e-05\Dipole=-0.260659  
 9,0.,0.4146723\PG=CS [SG(C1H1N1),X(C4H4)]\@

#### ClNH<sub>3</sub> (10)

1\1\GINC-IX\FREQ\UHF\6-31G(D)\C1H3N1(2)\AXN501\23-Oct-1995\1\#\# HF/6-  
 31G(D) FREQ SCF=DIRECT GEOM=CHECK GUESS=READ\clnh3 at C3v symmetry\0  
 ,2\C1\N,1,r1\H,2,r2,1,a1\H,2,r2,1,a1,3,120.,0\H,2,r2,1,a1,3,240.,0\r1  
 =2.68365137\r2=1.00177245\A1=110.54957432\Version=HP-PARisc-HPUX-G92/  
 DFT-RevG.1\HF=-515.6387434\S2=0.758\S2-1=0.\S2A=0.75\RMSD=8.389e-10\RM  
 SF=6.125e-05\Dipole=0.,0.,1.1726342\DipoleDeriv=-0.0973616,0.,0.,0.,-0.  
 0973616,0.,0.,0.,0.4716816,-0.36988,0.,0.,0.,-0.36988,0.,0.,0.,-0.911  
 1742,0.1167488,0.,-0.022024,0.,0.1947456,0.,-0.1385502,0.,0.1464975,0.  
 1752464,0.0337736,0.011012,0.0337736,0.136248,-0.0190733,0.0692751,-0.  
 119988,0.1464975,0.1752464,-0.0337736,0.011012,-0.0337736,0.136248,0.0  
 190733,0.0692751,0.119988,0.1464975\Polar=13.8146178,0.,13.8146178,0.,  
 0.,28.3607528\PolarDeriv=0.0078001,0.,-0.0078001,-3.4226978,0.,-0.0000  
 002,0.,-0.0078,0.,0.,-3.4226978,0.,-0.2578881,0.,-0.2578883,0.,0.,19.2  
 817341,-3.4196731,0.,3.419673,-3.4064474,0.,0.0000008,0.,3.4196731,0.,  
 0.,-3.4064468,0.,-4.0618527,0.,-4.0618527,-0.0000003,0.,0.7549362,7.06  
 5555,0.,0.0073537,3.1974092,0.,4.8277345,0.,1.2545185,0.,0.,1.3553545,  
 0.,2.2777094,0.,0.6021178,2.764126,0.,-6.6788899,-1.826841,2.0713678,-  
 1.7096133,1.815868,-0.7976331,-2.4138676,0.9912915,-2.3331958,5.134027  
 2,-0.7976329,2.736895,4.1809408,1.0210157,-0.7255524,1.8588116,-1.3820  
 629,2.3938029,-6.6788902,-1.826841,-2.0713678,-1.7096133,1.815868,0.79  
 76331,-2.4138676,-0.9912915,-2.3331958,-5.1340272,0.7976329,2.736895,-  
 4.1809408,1.0210157,0.7255524,1.8588116,-1.3820629,-2.3938029,-6.67889  
 02\HyperPolar=19.7191489,0.,-19.7191489,0.,22.298154,0.,22.2981598,-0.  
 0000005,0.,-1168.7934342\PG=C03V [C3(N1C11),3SGV(H1)]\NIMAG=0\0.00053  
 227,0.0,0.00053227,0.0,0.0,0.00779400,-0.00103896,0.0,0.0,0.76544968,0.  
 0,-0.00103896,0.0,0.0,0.76544968,0.0,0.0,-0.01373820,0.0,0.0,0.270860  
 51,0.00043020,0.0,-0.00123478,-0.43095196,0.0,-0.12934012,0.46395076,0

.0,-0.00009240,0.0,0.0,-0.07865518,0.0,0.0,0.07151677,-0.00088469,0.0,  
0.00198140,-0.18907441,0.0,-0.08570744,0.15030296,0.0,0.07711953,0.000  
03825,-0.00022629,0.00061739,-0.16672938,0.15254898,0.06467006,-0.0167  
1449,0.03915955,0.01982807,0.16962527,-0.00022629,0.00029955,-0.001069  
35,0.15254898,-0.34287777,-0.11201183,-0.00394713,0.00361540,0.0000577  
4,-0.16992890,0.36584226,0.00044234,-0.00076616,0.00198140,0.09453720,  
-0.16374324,-0.08570744,-0.00986403,0.01720048,0.00330325,-0.07515148,  
0.13016618,0.07711953,0.00003825,0.00022629,0.00061739,-0.16672938,-0.  
15254898,0.06467006,-0.01671449,-0.03915955,0.01982807,0.01378035,0.02  
155334,-0.00996404,0.16962527,0.00022629,0.00029955,0.00106935,-0.1525  
4898,-0.34287777,0.11201183,0.00394713,0.00361540,-0.00005774,-0.02155  
334,-0.02687944,0.01714274,0.16992890,0.36584226,0.00044234,0.00076616  
,0.00198140,0.09453720,0.16374324,-0.08570744,-0.00986403,-0.01720048,  
0.00330325,-0.00996404,-0.01714274,0.00330325,-0.07515148,-0.13016618,  
0.07711953\0.0,0.0,-0.00001025,0.0,0.0,0.00005040,0.00013302,0.0,-0.0  
0001338,-0.00006651,0.00011520,-0.00001338,-0.00006651,-0.00011520,-0.  
00001338\\@

1\1\ ANU-VP\FOpt\UMP2-FU\6-31G(d)\Cl1H3N1(2)\AXN501\12-Oct-1995\1\# U  
MP2=FULL/6-31G(D) FOPT=Z-MATRIX SCF=DIRECT\clnh3 C3v structure (10)\  
0,2\Cl\N,1,r1\H,2,r2,1,a1\H,2,r2,1,a1,3,120.,0\H,2,r2,1,a1,3,240.,0\ r  
1=2.38318897\ r2=1.01426742\ a1=108.09783626\ Version=Fujitsu-VP-Unix-G9  
4RevC.2\HF=-515.6358114\MP2=-515.9359968\PUHF=-515.6397312\ PMP2-0=-515  
.938104\ S2=0.762\ S2-1=0.751\ S2A=0.75\ RMSD=5.388e-09\ RMSF=3.117e-05\ Dip  
ole=0.,0.,1.78412\ PG=C03V [C3(N1C11),3SGV(H1)]\\@

ClNMe<sub>3</sub> (11)

1\1\ ANU-VP\Freq\UHF\6-31G(d)\C3H9Cl1N1(2)\AXN501\25-Oct-1995\0\#N GE  
OM=ALLCHECK GUESS=READ UHF/6-31G(D) FREQ\clnme3 C3v structure (11) +f  
rq. anl.\0,2\Cl,0.,0.,-1.8152201699\N,0.,0.,0.5869347989\C,1.40197883  
94,0.,0.9607260779\C,-0.7009894197,1.2141492905,0.9607260779\C,-0.7009  
894197,-1.2141492905,0.9607260779\H,1.5170239514,0.,2.0451420174\H,-0.  
7585119757,1.3137812801,2.0451420174\H,-0.7585119757,-1.3137812801,2.0  
451420174\H,1.8835308,0.8773695418,0.5536173069\H,1.8835308,-0.8773695  
418,0.5536173069\H,-1.7015897117,1.1925007507,0.5536173069\H,-0.181941  
0883,2.0698702925,0.5536173069\H,-0.1819410882,-2.0698702925,0.5536173  
069\H,-1.7015897117,-1.1925007507,0.5536173069\ Version=Fujitsu-VP-Uni  
x-G94RevC.2\HF=-632.7275889\ S2=0.768\ S2-1=0.\ S2A=0.75\ RMSD=1.694e-09\ R  
MSF=2.396e-05\ Dipole=0.,0.,1.8361675\ DipoleDeriv=-0.3223425,0.,-0.0000  
003,0.,-0.3223426,0.0000004,-0.0000003,0.0000001,1.0089174,-0.5568699,  
0.,0.0000017,0.,-0.5568698,-0.0000024,-0.0000005,0.0000002,0.7863102,0.  
5250996,0.0000002,1.2655501,0.,0.1380193,0.0000019,0.0727929,-0.00000  
01,-0.3115103,0.2347896,-0.1676107,-0.632788,-0.1676108,0.4283295,1.09  
60056,-0.0363965,0.0630406,-0.311493,0.2347895,0.1676107,-0.6327821,0.  
1676105,0.4283297,-1.0960076,-0.0363966,-0.0630402,-0.3114951,-0.03055  
32,0.,-0.4372418,0.,0.0502549,0.0000001,-0.0803907,0.,-0.3530399,0.030  
0528,0.0349909,0.2186196,0.034991,-0.0103512,-0.3786606,0.0401955,-0.0  
696204,-0.3530456,0.0300529,-0.0349909,0.2186206,-0.0349909,-0.0103512  
,0.3786652,0.0401954,0.0696204,-0.3530448,0.0077604,-0.0394165,-0.1392  
302,-0.0943583,-0.0561,-0.0553874,0.0166283,0.0601333,0.0330693,0.0077  
604,0.0394165,-0.139229,0.0943584,-0.0561,0.0553844,0.0166283,-0.06013  
34,0.0330677,-0.0980611,0.0332623,0.1175875,-0.0216797,0.0497216,-0.09  
28809,-0.0603911,-0.0156662,0.0330662,0.0177912,-0.088567,0.0216581,-0.  
0336252,-0.0661309,-0.1482705,0.0437629,0.0444672,0.0330658,0.0177912  
,0.0885671,0.0216525,0.0336252,-0.066131,0.1482694,0.0437629,-0.044467  
3,0.0330664,-0.0980612,-0.0332623,0.1175814,0.0216797,0.0497215,0.0928  
818,-0.0603911,0.0156661,0.0330643\ Polar=43.2970118,-0.0000002,43.2970  
111,-0.0000309,0.0000154,172.2430384\ PolarDeriv=0.2119211,-0.0000004,-  
0.2119191,-26.8439712,0.0000015,0.0000931,0.0000007,-0.2119218,0.00000  
08,0.0000037,-26.8439379,-0.0000024,-0.795661,0.0000051,-0.7956585,0.00  
00178,0.000046,-160.7924525,-2.9024332,-0.0000035,2.9024358,14.598114,  
0.000103,0.000222,-0.0000021,2.9024395,-0.000004,0.0001071,14.5980638,

-0.000832,-3.3773772,0.0000091,-3.3773744,0.0000805,-0.000047,602.1529  
 656,1.3935456,0.0000068,-2.5999706,-5.1740214,0.0000623,161.9566949,0.  
 0000031,-3.901031,0.0000015,-0.00018,-0.5480412,-0.000137,2.0901286,-0.  
 0000038,3.1358175,-2.8724762,0.0000984,-138.8174258,3.726566,-0.82457  
 22,-3.1233509,-1.7046499,2.0031076,-80.9783494,0.3021796,-2.472829,-1.  
 346972,2.0030321,-4.0175179,140.2585855,2.874392,0.4527939,2.3515549,1.  
 4362605,-2.4876163,-138.8173236,3.7265716,0.8245758,-3.1233578,-1.704  
 6862,-2.0031238,-80.978336,-0.3021722,-2.4728256,1.3469645,-2.003098,-  
 4.0174774,-140.2579231,2.8743977,-0.4527933,2.3515492,1.4362359,2.4878  
 098,-138.818103,1.5340233,-0.0000018,0.3319939,4.6676327,-0.0000106,-6  
 6.8390415,0.,1.1597358,0.,-0.0000004,3.5712772,0.0000577,1.6481757,-0.  
 0000011,0.1270865,6.0262077,-0.0000003,-5.9700897,-1.186052,0.762427,0.  
 253042,3.8453016,-0.4747484,33.419562,0.045581,-0.1608274,1.5704391,-  
 0.4747375,4.3935237,-57.884426,0.5073583,-0.6586509,1.2679051,-3.01313  
 97,5.2188958,-5.9698312,-1.1860538,-0.7624286,0.2530442,3.8453194,0.47  
 47309,33.4196077,-0.0455843,-0.1608281,-1.5704341,0.4747627,4.3935007,  
 57.8843284,0.5073601,0.6586513,1.2679019,-3.0131419,-5.2188793,-5.9699  
 36,2.9976343,2.5872719,1.308243,1.1506179,1.3054152,-19.2793997,1.8613  
 175,2.61739,4.525162,1.6985287,1.6729446,-14.5190732,-1.0256014,-0.363  
 4968,-1.0839906,0.4382911,0.2389659,-1.1667044,2.9976339,-2.5872719,1.  
 3082432,1.1506389,-1.3054612,-19.2795709,-1.8613191,2.6173898,-4.52516  
 22,-1.6984699,1.6729276,14.5191915,-1.0256028,0.3634972,-1.0839895,0.4  
 383946,-0.2390961,-1.1665581,-7.2908262,1.1470046,-0.3929696,2.843163,  
 -0.721361,22.2134475,0.3762262,-1.6762343,0.1595318,-0.3282618,-0.0195  
 597,-9.4368732,-1.3841898,0.1564665,-0.7254016,-0.4262171,0.2601665,-1.  
 1661637,1.6341492,1.8512507,1.7437642,0.2417036,1.1736933,-2.9344616,  
 0.3545194,1.7178868,6.5677196,0.7806989,2.5819298,-23.9560102,-0.75459  
 52,-0.2070294,-1.3549964,-0.0121638,0.4991625,-1.1662893,1.6341489,-1.  
 8512501,1.7437656,0.2417132,-1.1736672,-2.9344266,-0.3545196,1.717886,  
 -6.5677205,-0.7806763,2.5819474,23.9561246,-0.7545959,0.2070305,-1.354  
 9974,-0.0121343,-0.4992263,-1.1662933,-7.2908259,-1.1470043,-0.3929681  
 ,2.8431447,0.7213488,22.2138764,-0.3762255,-1.6762347,-0.1595328,0.328  
 2366,-0.0196144,9.4369858,-1.3841901,-0.156466,-0.7254019,-0.4261991,-  
 0.2601607,-1.1661785\HyperPolar=-16.6033057,0.000006,16.6033074,0.0000  
 065,59.7945231,-0.000531,59.7943229,-0.0012647,-0.0041375,-19146.14232  
 35\PG=C03V [C3(N1C11),3SGV(C1H1),X(H6)]\NImag=0\0.00597988,0.,0.00597  
 987,0.,0.,0.04386031,-0.00527570,0.,-0.00000002,0.65700598,0.,-0.00527  
 568,0.00000002,0.,0.65700593,0.,-0.00000001,-0.05137151,0.,0.00000004,  
 0.31205826,-0.00134001,0.,-0.01240731,-0.24979816,0.00000001,-0.041911  
 37,0.56933576,0.,-0.00061133,-0.00000002,0.,-0.12204441,-0.00000002,-0.  
 00000002,0.72037384,-0.00562956,0.,-0.00067753,-0.06176189,-0.0000000  
 2,-0.08744440,-0.03800892,0.00000001,0.63025297,-0.00079351,0.00031561  
 ,0.00620378,-0.15398285,0.05531886,0.02095587,-0.01973343,0.03721123,0.  
 01023639,0.68261431,0.00031554,-0.00115786,-0.01074512,0.05531896,-0.  
 21785970,-0.03629643,0.00103841,0.00234997,0.00527130,0.06540141,0.607  
 09530,0.00281479,-0.00487526,-0.00067769,0.03088096,-0.05348748,-0.087  
 44461,-0.00055315,0.01150068,-0.00064479,0.01900445,-0.03291670,0.6302  
 5297,-0.00079352,-0.00031561,0.00620373,-0.15398288,-0.05531884,0.0209  
 5582,-0.01973346,-0.03721121,0.01023646,0.01339170,0.01808639,-0.00968  
 328,0.68261434,-0.00031553,-0.00115785,0.01074514,-0.05531900,-0.21785  
 972,0.03629646,-0.00103840,0.00235000,-0.00527130,-0.01808642,-0.03077  
 516,0.00622933,-0.06540140,0.60709527,0.00281478,0.00487522,-0.0006776  
 7,0.03088093,0.05348753,-0.08744458,-0.00055311,-0.01150063,-0.0006447  
 9,-0.00968330,-0.00622938,-0.00064479,0.01900447,0.03291668,0.63025297  
 ,-0.00008021,0.,0.00410952,-0.01796571,0.,-0.04049773,-0.05913608,0.,-  
 0.01672688,0.00048834,0.00052512,-0.00453989,0.00048839,-0.00052509,-0.  
 00453988,0.06919688,0.,0.00040387,0.,0.,0.00118487,0.,0.,-0.06530611,  
 0.,-0.00043560,0.00045813,0.00148332,0.00043559,0.00045812,-0.00148333  
 ,0.,0.05642349,-0.00059846,0.,0.00237288,-0.01157072,0.,-0.00831832,-0.  
 01431197,0.,-0.32661534,0.00032302,-0.00032895,-0.00040940,0.00032304  
 ,0.00032893,-0.00040942,0.02774270,0.,0.35686836,0.00028286,0.00020961  
 ,-0.00205475,-0.00360278,0.00829245,0.02024888,0.00042693,-0.00047108,  
 0.00355454,-0.06376360,-0.00267170,0.00836344,0.00050445,0.00044490,0.

00098536,0.00087541,-0.00002349,-0.00060752,0.05961684,0.00020961,0.00  
004080,0.00355893,0.00829245,-0.01317804,-0.03507209,0.00048960,0.0005  
1958,-0.00318999,-0.00267171,-0.06067859,-0.01448590,-0.00051582,0.000  
44203,-0.00467332,-0.00106236,0.00024848,0.00060767,-0.00553104,0.0660  
0353,0.00029922,-0.00051831,0.00237293,0.00578537,-0.01002049,-0.00831  
825,-0.00044638,0.00011529,-0.00040942,0.00715598,-0.01239453,-0.32661  
534,0.00012337,0.00044422,-0.00040940,0.00083001,-0.00022230,0.0004889  
2,-0.01387135,0.02402589,0.35686836,0.00028286,-0.00020961,-0.00205476  
, -0.00360278,-0.00829246,0.02024887,0.00042692,0.00047106,0.00355453,0  
.00050444,-0.00044486,0.00098534,-0.06376361,0.00267171,0.00836344,0.0  
0087540,0.00002350,-0.00060752,-0.00006497,0.00051943,-0.00022250,0.05  
961684,-0.00020961,0.00004081,-0.00355898,-0.00829244,-0.01317807,0.03  
507202,-0.00048966,0.00051955,0.00319000,0.00051582,0.00044207,0.00467  
332,0.00267170,-0.06067858,0.01448590,0.00106236,0.00024849,-0.0006076  
6,-0.00051944,0.00118886,-0.00082997,0.00553104,0.06600353,0.00029923,  
0.00051834,0.00237292,0.00578536,0.01002045,-0.00831826,-0.00044639,-0  
.00011527,-0.00040940,0.00012334,-0.00044423,-0.00040942,0.00715599,0.  
01239453,-0.32661534,0.00083002,0.00022229,0.00048892,-0.00022249,0.00  
082996,0.00048892,-0.01387135,-0.02402589,0.35686836,0.00029623,0.0002  
6567,0.00168126,-0.02392460,-0.03663397,0.01473129,-0.11097541,-0.0954  
0075,0.04573805,0.00041991,-0.00168076,0.00013137,-0.00719384,0.002563  
76,-0.00323300,0.00239633,0.00334124,-0.00027056,0.00013467,-0.0000616  
3,-0.00012463,0.00021047,0.00037348,0.00019483,0.12944994,0.00065101,0  
.00028288,0.00115128,-0.00000963,0.00099287,-0.00057062,-0.10565151,-0  
.26303087,0.09340419,0.00097946,0.00123817,-0.00097062,-0.00018361,0.0  
0024233,-0.00095191,0.00153562,0.00293699,-0.00067551,0.00013019,-0.00  
043268,-0.00003370,0.00022203,0.00032333,0.00001321,0.11492946,0.27715  
875,-0.00019321,-0.00019222,0.00040421,-0.00731111,-0.01244789,0.00443  
358,0.05324764,0.09818045,-0.10633928,0.00015656,0.00019211,-0.0001703  
4,-0.00221130,0.00014089,-0.00019392,0.01582308,0.03106925,-0.01246463  
,0.00009739,0.00018119,-0.00017169,-0.00041428,-0.00029750,0.00040298,  
-0.05082971,-0.10397073,0.10609002,0.00029623,-0.00026567,0.00168125,-  
0.02392461,0.03663397,0.01473128,-0.11097542,0.09540075,0.04573806,-0.  
00719384,-0.00256377,-0.00323298,0.00041989,0.00168072,0.00013135,0.00  
239634,-0.00334124,-0.00027056,0.00021047,-0.00037347,0.00019484,0.000  
13467,0.00006164,-0.00012463,0.00943843,-0.01312416,-0.00793635,0.1294  
4994,-0.00065102,0.00028287,-0.00115125,0.00000964,0.00099289,0.000570  
66,0.10565154,-0.26303087,-0.09340421,0.00018359,0.00024237,0.00095187  
, -0.00097947,0.00123814,0.00097059,-0.00153563,0.00293699,0.00067550,-  
0.00022202,0.00032331,-0.00001322,-0.00013018,-0.00043266,0.00003369,0  
.01312416,-0.02148478,-0.01233715,-0.11492946,0.27715875,-0.00019320,0  
.00019222,0.00040422,-0.00731111,0.01244788,0.00443360,0.05324765,-0.0  
9818045,-0.10633929,-0.00221132,-0.00014087,-0.00019394,0.00015656,-0.  
00019212,-0.00017034,0.01582307,-0.03106925,-0.01246463,-0.00041428,0.  
00029749,0.00040298,0.00009739,-0.00018119,-0.00017169,-0.00793635,0.0  
1233715,0.00706252,-0.05082971,0.10397073,0.10609002,0.00068315,-0.000  
42768,-0.00183772,-0.02110363,0.00163841,-0.00687156,-0.00058608,0.003  
99860,0.00244088,-0.31207519,-0.01045350,-0.10375943,0.00072993,-0.000  
80047,0.00077490,0.00055298,-0.00002428,-0.00010886,0.00491357,-0.0000  
8230,0.00072029,-0.00026115,-0.00035872,0.00009150,0.00060918,0.000173  
55,-0.00003636,-0.00084102,0.00009134,-0.00049836,0.33976338,-0.000042  
28,-0.00010404,0.00088035,0.03826267,-0.00182810,0.01304294,0.00125123  
, -0.00636544,-0.00232390,-0.02070426,-0.06193109,-0.00709178,0.0018597  
5,0.00092815,0.00059908,-0.00017574,-0.00001918,0.00016213,-0.00188791  
, 0.00041975,0.00010344,-0.00016690,-0.00003686,-0.00009108,0.00001718,  
0.00036043,-0.00030388,0.00193226,0.00032731,0.00042010,0.00649506,0.0  
6684531,0.00026307,-0.00007122,0.00040423,0.01443574,-0.00010764,0.004  
43361,0.00098364,-0.00198549,-0.00019392,-0.11165058,-0.00297642,-0.10  
633928,-0.00024465,0.00003953,-0.00017034,0.00046478,-0.00021003,0.000  
40298,-0.03481830,-0.00183143,-0.01246463,-0.00020561,-0.00000626,-0.0  
0017169,-0.00027871,-0.00018192,-0.00002463,0.00061299,-0.00022154,0.0  
0058969,0.11545615,0.00796554,0.10609002,-0.00011072,0.00041603,0.0001  
5631,0.01063066,0.01994090,-0.00785996,0.00133723,0.00150910,-0.000906

23,-0.13795881,-0.12123041,0.05802138,-0.00264734,0.00244134,0.0007921  
 5,-0.00032051,-0.00013262,0.00003314,0.00069008,0.00055052,-0.00044972  
 ,0.00003725,0.00012201,-0.00008597,-0.00036033,0.00045706,0.00012420,0  
 .00034003,0.00001815,-0.00001819,-0.01375398,-0.02651430,0.01465247,0.  
 14069971,0.00003072,0.00068985,0.00203165,-0.01668348,-0.03356241,0.01  
 247238,-0.00115110,0.00032080,-0.00037155,-0.11097962,-0.23604747,0.08  
 631243,0.00518870,-0.00430414,-0.00327578,-0.00032444,0.00002252,-0.00  
 012478,0.00235613,0.00464325,-0.00057206,0.00027346,0.00049653,0.00017  
 535,0.00095619,0.00045562,-0.00012675,-0.00013822,0.00062958,-0.000332  
 33,-0.00026599,0.00170763,-0.00070451,0.12142452,0.26590897,-0.0000698  
 6,-0.00026344,0.00040424,-0.00712463,-0.01255554,0.00443362,0.00008810  
 ,0.00023164,-0.00017034,0.05840294,0.09520404,-0.10633929,0.00122766,-  
 0.00184462,-0.00019394,0.00010822,0.00017494,-0.00017169,0.01899522,0.  
 02923781,-0.01246463,-0.00005050,-0.00050752,0.00040298,-0.00017187,0.  
 00004419,0.00040608,-0.00024499,-0.00018343,-0.00002463,-0.000671611,-0  
 .01304166,0.00706252,-0.06462644,-0.09600519,0.10609002,-0.00011071,-0  
 .00041605,0.00015637,0.01063065,-0.01994087,-0.00785988,0.00133728,-0.  
 00150910,-0.00090627,-0.00264735,-0.00244131,0.00079212,-0.13795882,0.  
 12123039,0.05802137,-0.00032053,0.00013262,0.00003313,0.00003725,-0.00  
 012202,-0.00008598,0.00069008,-0.00055052,-0.00044972,0.00034003,-0.00  
 001815,-0.00001819,-0.00036033,-0.00045706,0.00012420,0.00050520,-0.00  
 007721,0.00028135,0.00091147,-0.00092046,-0.00011464,0.14069971,-0.000  
 03072,0.00068986,-0.00203164,0.01668347,-0.03356240,-0.01247235,0.0011  
 5112,0.00032080,0.00037155,-0.00518868,-0.00430416,0.00327581,0.110979  
 63,-0.23604746,-0.08631241,0.00032444,0.00002252,0.00012478,-0.0002734  
 8,0.00049655,-0.00017534,-0.00235614,0.00464324,0.00057207,0.00013822,  
 0.00062958,0.00033233,-0.00095619,0.00045562,0.00012675,-0.00023358,0.  
 00046441,0.00012046,0.00092046,-0.00142518,-0.00064164,-0.12142452,0.2  
 6590897,-0.00006986,0.00026344,0.00040423,-0.00712463,0.01255554,0.004  
 43361,0.00008810,-0.00023164,-0.00017034,0.00122767,0.00184460,-0.0001  
 9392,0.05840294,-0.09520403,-0.10633928,0.00010822,-0.00017494,-0.0001  
 7169,-0.00005050,0.00050753,0.00040298,0.01899522,-0.02923781,-0.01246  
 463,-0.00024499,0.00018343,-0.00002463,-0.00017187,-0.00004419,0.00040  
 608,0.00029690,-0.00015041,-0.00002463,-0.00011464,0.00064164,0.000589  
 69,-0.06462644,0.09600519,0.10609002,0.00068316,0.00042769,-0.00183766  
 ,-0.02110362,-0.00163843,-0.00687149,-0.00058604,-0.00399860,0.0024408  
 3,0.00072993,0.00080047,0.00077488,-0.31207520,0.01045348,-0.10375945,  
 0.00055295,0.00002428,-0.00010887,-0.00026115,0.00035871,0.00009149,0.  
 00491358,0.00008231,0.00072028,-0.00084102,-0.00009134,-0.00049836,0.0  
 0060918,-0.00017355,-0.00003636,0.00086359,-0.00024956,0.00004767,0.00  
 050520,0.00023358,0.00029690,-0.01375398,0.00026599,-0.00671611,0.3397  
 6338,0.00004228,-0.00010405,-0.00088036,-0.03826266,-0.00182807,-0.013  
 04296,-0.00125124,-0.00636544,0.00232391,-0.00185972,0.00092810,-0.000  
 59904,0.02070426,-0.06193109,0.00709178,0.00017574,-0.00001918,-0.0001  
 6213,0.00016689,-0.00003684,0.00009109,0.00188791,0.00041975,-0.000103  
 44,-0.00193226,0.00032731,-0.00042010,-0.00001718,0.00036043,0.0003038  
 8,0.00024956,-0.00076830,0.00017094,0.00007721,0.00046441,0.00015041,0  
 .02651430,0.00170763,0.01304166,-0.00649506,0.06684531,0.00026307,0.00  
 007124,0.00040425,0.01443573,0.00010763,0.00443364,0.00098366,0.001985  
 49,-0.00019394,-0.00024466,-0.00003952,-0.00017034,-0.11165059,0.00297  
 641,-0.10633929,0.00046478,0.00021003,0.00040298,-0.00020561,0.0000062  
 5,-0.00017169,-0.03481829,0.00183144,-0.01246463,0.00061299,0.00022154  
 ,0.00058969,-0.00027871,0.00018192,-0.00002463,0.00004767,-0.00017094,  
 0.00040608,0.00028135,-0.00012046,-0.00002463,0.01465247,0.00070451,0.  
 00706252,0.11545615,-0.00796554,0.10609002\0.,0.,-0.00001959,0.,0.,0.  
 00011740,-0.00002843,0.,-0.00004646,0.00001421,-0.00002462,-0.00004646  
 ,0.00001421,0.00002462,-0.00004646,0.00000574,0.,0.00001477,-0.0000028  
 7,0.00000497,0.00001477,-0.00000287,-0.00000497,0.00001477,-0.00000434  
 ,0.00000554,-0.00000045,-0.00000434,-0.00000554,-0.00000045,-0.0000026  
 3,-0.00000653,-0.00000045,0.00000697,-0.00000099,-0.00000045,0.0000069  
 7,0.00000099,-0.00000045,-0.00000263,0.00000653,-0.00000045\\\@

1\1\ ANU-VP\FOp\t\UMP2-FU\6-31G(d)\C3H9C11N1(2)\AXN501\12-Oct-1995\0\#



```

MP2=FULL/6-31G* SCF=DIRECT FOPT\\c1nme3 C3v structure (11)\\0,2\\C1,0.
,0.,-1.774978704\\N,0.,0.,0.5741597299\\C,1.4078328852,0.,0.9409311711\\C
,-0.7039164426,1.2192190429,0.9409311711\\C,-0.7039164426,-1.2192190429
,0.9409311711\\H,1.527767642,0.,2.0339285632\\H,-0.763883821,1.323085589
1,2.0339285632\\H,-0.763883821,-1.3230855891,2.0339285632\\H,1.882905709
5,0.8860795729,0.519495515\\H,1.8829057095,-0.8860795729,0.519495515\\H,
-1.7088202747,1.1876043909,0.519495515\\H,-0.1740854348,2.0736839638,0.
519495515\\H,-0.1740854348,-2.0736839638,0.519495515\\H,-1.7088202747,-1
.1876043909,0.519495515\\Version=Fujitsu-VP-Unix-G94RevC.2\\HF=-632.726
6327\\MP2=-633.4408344\\PUHF=-632.7320815\\PMP2-0=-633.4439533\\S2=0.768\\S
2-1=0.753\\S2A=0.75\\RMSD=4.858e-09\\RMSF=8.400e-05\\Dipole=0.,0.,1.983676
3\\PG=C03V [C3(N1C11),3SGV(C1H1),X(H6)]\\@

```

# C1NCl3 (12)

```

1\\1\\GINC-RSCQC9\\Freq\\UHF\\6-31G(d)\\C14N1(2)\\AXN501\\17-Jan-1996\\0\\#N GE
OM=ALLCHECK GUESS=READ UHF/6-31G(D) FREQ\\nc14 structure\\0,2\\C1,0.,0.
,-2.9087516755\\N,0.,0.,0.3674062814\\C1,1.6316469534,0.,0.9191555787\\C1
,-0.8158234767,1.4130477116,0.9191555787\\C1,-0.8158234767,-1.413047711
6,0.9191555787\\Version=IBM-RS6000-G94RevC.2\\HF=-1892.1845974\\S2=0.755
\\S2-1=0.\\S2A=0.75\\RMSD=1.819e-09\\RMSF=2.287e-06\\Dipole=0.,0.,0.3630661
\\DipoleDeriv=-0.0095643,0.,-0.0000009,0.,-0.0095616,0.,-0.0000005,0.,0
.0565809,0.5522724,0.,-0.0000003,0.,0.5522857,0.,-0.0000031,0.,-0.1830
824,-0.3112387,0.,0.0243921,0.,-0.050568,0.,-0.1880408,0.,0.0421679,-0
.1157348,0.1129012,-0.0121959,0.1128748,-0.2460777,0.0211235,0.0940221
,-0.1628578,0.0421676,-0.1157348,-0.1129012,-0.0121959,-0.1128748,-0.2
460777,-0.0211235,0.0940221,0.1628578,0.0421676\\Polar=49.2849289,0.,49
.2849624,-0.000028,0.,29.0315152\\PolarDeriv=-0.0071328,0.,0.0070096,-0
.6222625,0.,0.000026,0.,0.0072366,0.,0.,-0.6224822,0.,-0.3381469,0.,-0
.338175,0.0000093,0.,2.6399966,-10.3938402,0.,10.3938909,-5.2464651,0.
,-0.0000095,0.,10.3937582,0.,0.,-5.2466186,0.,-9.3882775,0.,-9.3879079
,-0.0000023,0.,-6.6359402,26.3547851,0.,1.3101711,3.3117043,0.,0.37314
68,0.,5.5884122,0.,0.,0.6008148,0.,5.597164,0.,0.8877815,6.5351809,0.,
1.3319711,-7.9769377,7.8422748,-5.8555789,1.2785268,-1.1738519,-0.1865
687,4.13705,-7.9947005,19.8216711,-1.17383,2.6340369,0.3231518,2.06483
01,-2.0391961,4.4192136,-3.2675929,5.6596815,1.3319659,-7.9769377,-7.8
422748,-5.8555789,1.2785268,1.1738519,-0.1865687,-4.13705,-7.9947005,-
19.8216711,1.17383,2.6340369,-0.3231518,2.0648301,2.0391961,4.4192136,
-3.2675929,-5.6596815,1.3319659\\HyperPolar=44.4968938,0.,-44.500482,0.
,31.7873724,0.,31.7947995,-0.0008928,0.,-90.4445827\\PG=C03V [C3(N1C11)
,3SGV(C11)]\\NImag=0\\0.00019521,0.,0.00019507,0.00000002,0.,0.00133442
,-0.00017262,0.,0.,0.33292277,0.,-0.00017307,0.,0.,0.33292283,0.000000
11,0.,-0.00133240,0.,0.,0.13666739,-0.00006575,0.,0.00012291,-0.181719
80,0.,-0.04540864,0.24357887,0.,0.00005072,0.,0.,-0.04011366,0.,0.,0.0
4839881,-0.00026654,0.,-0.00000068,-0.07478136,0.,-0.04511173,0.056163
58,0.,0.03231326,0.00002157,0.00004948,-0.00006145,-0.07551518,0.06131
735,0.02270431,-0.03089667,0.03034884,0.00944214,0.09719382,0.00005040
,-0.00003639,0.00010644,0.06131727,-0.14631827,-0.03932501,0.01594670,
-0.00416792,-0.00082890,-0.08451545,0.19478385,0.00013321,-0.00023049,
-0.00000069,0.03739069,-0.06476259,-0.04511172,-0.00543892,0.00776268,
0.00639961,-0.02808179,0.04863909,0.03231326,0.00002157,-0.00004948,-0
.00006145,-0.07551518,-0.06131735,0.02270431,-0.03089667,-0.03034884,0
.00944214,0.00919645,0.00720107,-0.00400322,0.09719382,-0.00005040,-0
.00003639,-0.00010644,-0.06131727,-0.14631827,0.03932501,-0.01594670,-0
.00416792,0.00082890,-0.00720107,-0.04426104,0.00859158,0.08451545,0.1
9478385,0.00013321,0.00023049,-0.00000069,0.03739069,0.06476259,-0.045
11172,-0.00543892,-0.00776268,0.00639961,-0.00400322,-0.00859158,0.006
39961,-0.02808179,-0.04863909,0.03231326\\0.,0.,-0.00000015,0.,0.,-0.0
000636,0.00000282,0.,0.00000217,-0.00000141,0.00000244,0.00000217,-0.
00000141,-0.00000244,0.00000217\\@

```

```

1\\1\\GINC-RSCQC9\\FOpt\\UMP2-FU\\6-31G(d)\\C14N1(2)\\AXN501\\19-Jan-1996\\1\\#
MP2=FULL/6-31G(D) OPT=Z-MATRIX\\nc14 structure\\0,2\\C1\\N,1,r1\\C1,2,r2,

```

```
1,a1\Cl,2,r2,1,a1,3,120.,0\Cl,2,r2,1,a1,3,240.,0\\r1=2.60478104\r2=1.7
6510681\al=110.63932311\\Version=IBM-RS6000-G94RevC.2\HF=-1892.1782285
\MP2=-1892.9054419\PUHF=-1892.1809022\PM2=0=-1892.9067816\S2=0.756\S2
-1=0.75\S2A=0.75\RMSD=6.145e-09\RMSF=3.702e-05\Dipole=0.,0.,0.6655572\
PG=C03V [C3(N1Cl1),3SGV(Cl1)]\\@
```

ClNH=CH<sub>2</sub> (13a)

```
1\1\GINC-RSCQC2\Freq\UHF\6-31G(d)\ClH3Cl1N1(2)\AXN501\24-Oct-1995\0\\#
N GEOM=ALLCHECK GUESS=READ UHF/6-31G(D) FREQ\HClN=CH2 Cs all-in-plane
structure (13a) + frq.anl.\0,2\C,1.2141371873,0.,-1.7227150756\N,1.1
931254239,0.,-0.4707946584\H,2.1154378982,0.,-0.0703884208\H,2.1191087
848,0.,-2.3176494762\H,0.282011836,0.,-2.2653781249\Cl,-1.1854858594,0
.,1.0756040638\\Version=IBM-RS6000-G94RevC.2\State=2-A'\HF=-553.481021
4\S2=0.779\S2-1=0.\S2A=0.75\RMSD=6.173e-10\RMSF=8.633e-06\Dipole=0.855
6487,0.,-0.8243268\DipoleDeriv=0.4119777,0.,0.0635807,0.,0.0220824,0.,
-0.1282202,0.,0.4172825,-0.3952336,0.,0.2032854,0.,-0.4992634,0.,0.176
7522,0.,-0.5989533,-0.0137619,0.,-0.0974372,0.,0.289368,0.,0.0535882,0
.,0.2024031,-0.1114042,0.,0.1030587,0.,0.1511733,0.,0.0933357,0.,-0.07
05026,-0.0728589,0.,-0.0797762,0.,0.0903625,0.,-0.0451784,0.,-0.015522
3,0.1812809,0.,-0.1927114,0.,-0.0537227,0.,-0.1502774,0.,0.0652927\Pol
ar=27.5634864,0.,12.7138286,-4.3730813,0.,34.8650476\PolarDeriv=-4.429
6498,0.,0.4464006,7.7896397,0.,-3.8874446,0.,0.4317599,0.,0.,-5.378706
4,0.,0.0409508,0.,-1.3417826,-0.0314076,0.,-19.5691557,-8.1053651,0.,-
0.2985233,0.4496765,0.,-3.6272822,0.,-0.3712565,0.,0.,5.0162116,0.,3.0
620015,0.,1.5634593,-1.9132893,0.,22.1233626,5.9544143,0.,0.042134,6.1
385972,0.,0.9888696,0.,1.459526,0.,0.,0.6201984,0.,5.5055735,0.,-0.113
2606,-0.8180358,0.,6.1483901,6.3426615,0.,0.2712425,-4.8728859,0.,2.70
04556,0.,1.5897719,0.,0.,-0.6224308,0.,-1.7173455,0.,-0.1199982,2.1153
671,0.,-4.07107,-4.8156161,0.,-0.4345082,-3.8894228,0.,-1.6626549,0.,-
1.61242,0.,0.,-0.9057795,0.,-1.7575709,0.,-0.0226514,-2.4031346,0.,-3.
67258,5.0535553,0.,-0.0267456,-5.6156047,0.,5.4880565,0.,-1.4973812,0.
,0.,1.2705067,0.,-5.1336094,0.,0.0342335,3.0505002,0.,-0.958947\HyperP
olar=-261.6125779,0.,0.9662119,0.,233.0316672,0.,-7.4801816,-190.06202
25,0.,127.077303\PG=CS [SG(ClH3Cl1N1)]\NImag=0\\0.74068159,0.,0.173753
33,0.01553282,0.,0.97431075,-0.14440854,0.,-0.03431294,0.55263084,0.,-
0.05985838,0.,0.07652508,0.04013089,0.,-0.67103672,0.14248626,0.,0.
84369562,-0.00200940,0.,0.01422493,-0.42365608,0.,-0.18010086,0.417564
74,0.,0.00420933,0.,0.,-0.04612990,0.,0.,0.03629564,-0.05513463,0.,-0.
02539702,-0.11113301,0.,-0.11013211,0.16688052,0.,0.13686156,-0.286491
25,0.,0.11999781,0.01037636,0.,0.00447492,0.00443286,0.,-0.00040844,0.
29084398,0.,-0.06252446,0.,0.,0.03807877,0.,0.,-0.01548257,0.,0.,0.028
54413,0.11463760,0.,-0.14399539,0.03893840,0.,-0.03369451,0.00097756,0
.,0.00327465,-0.14019871,0.,0.16225802,-0.31044708,0.,-0.12140848,0.01
182505,0.,-0.00621438,0.00279300,0.,0.00169213,-0.01912038,0.,-0.01336
102,0.31504025,0.,-0.05576921,0.,0.,-0.00813654,0.,0.,0.02110255,0.,0.
,0.01106443,0.,0.,0.03200181,-0.11399358,0.,-0.12976537,-0.03960087,0.
,-0.02886739,-0.00133875,0.,-0.00617927,0.01608055,0.,0.01152466,0.139
19317,0.,0.15299956,0.00267468,0.,0.00596586,-0.00676762,0.,-0.0007768
3,0.00087489,0.,-0.00189656,-0.0004156,0.,-0.00099383,-0.00009084,0.,
-0.00034053,0.00335046,0.,0.00018939,0.,0.,-0.00047902,0.,0.,0.0000049
5,0.,0.,0.00031970,0.,0.,-0.00026304,0.,0.,0.00022801,-0.00117311,0.,-
0.00411624,0.00362217,0.,0.00003511,-0.00064340,0.,0.00157219,0.000053
88,0.,0.00063257,0.00009858,0.,0.00028781,-0.00195811,0.,0.00158856\\-
0.00000342,0.,0.00001710,0.00001716,0.,0.00000424,-0.00002050,0.,-0.00
001001,-0.00000673,0.,-0.00000411,0.00000981,0.,-0.00000542,0.00000368
,0.,-0.00000181\\@
```

```
1\1\ ANU-VP\FOpt\UMP2-FU\6-31G(d)\ClH3Cl1N1(2)\AXN501\12-Oct-1995\0\\#
UMP2=FULL/6-31G* FOPT SCF=DIRECT\HClN=CH2 Cs all-in-plane structure
(13a)\0,2\C,1.0856696164,0.,-1.5757434749\N,1.0866283107,0.,-0.334754
917\H,2.0176094912,0.,0.0881581009\H,1.9835159771,0.,-2.202959961\H,0.
1304654824,0.,-2.099963505\Cl,-1.0736474602,0.,0.9419123902\\Version=F
```

ujitsu-VP-Unix-G94RevC.2\State=2-A'\HF=-553.4788255\MP2=-553.89266\PUHF=-553.4842851\PMF2=0=-553.8971171\S2=0.797\S2-1=0.779\S2A=0.751\RMSD=9.318e-09\RMSF=1.048e-05\Dipole=1.1649915,0.,-1.0948341\PG=CS [SG(C1H3C11N1)]\@

#### ClNH-CH<sub>2</sub> (13b)

1\1\GINC-RSCQC2\FOpt\UMP2-FU\6-31G(d)\C1H3C11N1(2)\AXN501\15-Nov-1995\0\# MP2=FULL/6-31G\* SCF=DIRECT FOPT\HClN=CH2 2c-2e, C1 "perpendicular" (13b) structure\0,2\C,1.5550378668,-0.343433283,-0.287892143\N,0.5692792164,0.5460361676,0.1364063906\H,0.5428879985,1.393446888,-0.430020518\H,2.481875708,0.1282613048,-0.5874161992\H,1.5735701152,-1.3063238059,0.2033551384\C1,-1.0537362081,-0.1162963448,0.093328806\Version=IBM-RS6000-G94RevC.2\HF=-553.4433414\MP2=-553.8645057\PUHF=-553.4470393\PMF2=0=-553.8672678\S2=0.772\S2-1=0.761\S2A=0.75\RMSD=4.453e-09\RMSF=1.857e-05\Dipole=-0.4710124,0.2952,0.3489364\PG=C01 [X(C1H3C11N1)]\@

#### N-Chloropyridinyl (14)

1\1\GINC-PC\Freq\UHF\6-31G(d)\C5H5C11N1(2)\AXN501\23-Jan-1996\0\#N GEOM=ALLCHECK GUESS=READ UHF/6-31G(D) FREQ\cl-pyridine structure+freq. a n1.\0,2\N,0.,0.,0.1759237988\C,0.,1.1337112985,-0.5021105034\C,0.,-1.1337112985,-0.5021105034\C,0.,1.191012896,-1.8855152391\C,0.,-1.191012896,-1.8855152391\C,0.,0.,-2.5904579503\H,0.,2.0360962086,0.0828516745\H,0.,-2.0360962086,0.0828516745\H,0.,2.1400659323,-2.3884815072\H,0.,-2.1400659323,-2.3884815072\H,0.,0.,-3.6657501926\C1,0.,0.,3.0141058752\Version=SGI-G94RevC.3\State=2-A1\HF=-706.1483574\S2=0.758\S2-1=0.\S2A=0.75\RMSD=3.163e-09\RMSF=3.643e-05\Dipole=0.,0.,-1.2747458\DipoleDeriv=-0.3330028,0.,0.,0.,-0.4338927,0.0000007,0.,0.,-0.7674332,0.0738904,0.,0.,0.,0.2862827,-0.0661009,0.,0.3402493,0.3152267,0.0738905,0.,0.,0.,0.2862828,0.0661006,0.,-0.3402493,0.3152267,-0.1555343,0.,0.,0.,-0.100446,-0.1381159,0.,-0.4045188,-0.2778153,-0.1555343,0.,0.,0.,-0.100446,0.1381174,0.,0.4045189,-0.2778164,-0.0490061,0.,0.,0.,0.2946288,0.0000002,0.,0.0000001,0.3090817,0.0996638,0.,0.,0.,-0.0660995,-0.0583865,0.,-0.0852358,0.0307823,0.0996638,0.,0.,0.,-0.0660997,0.0583858,0.,0.0852359,0.0307834,0.1396808,0.,0.,0.,-0.0641722,0.0697434,0.,0.0694304,0.0307185,0.1396806,0.,0.,0.,-0.0641721,-0.0697444,0.,-0.0694305,0.0307174,0.1205536,0.,0.,0.,0.0821437,-0.0000002,0.,0.,-0.1043743,-0.053946,0.,0.,0.,-0.0540101,-0.0000001,0.,0.,0.3649023\Polar=25.4354661,0.,68.9228682,0.,-0.000003,81.1213633\PolarDeriv=0.,-0.0000052,0.,2.188482,0.,0.,-0.0000096,0.,0.0000025,0.,-1.8067369,0.00008,-0.0205002,0.,-0.5226686,0.,-0.0000021,6.7796919,0.,2.0745418,0.,1.8189759,0.,0.,0.1489442,0.,0.2304078,0.,0.6896525,9.5660639,0.1529962,0.,2.7486433,0.,0.7267045,7.6816045,0.,-2.0745389,0.,1.8189183,0.,0.,-0.1489317,0.,-0.2304146,0.,0.689781,-9.5661916,0.1529905,0.,2.7486735,0.,-0.7267661,7.6817906,0.,3.5569327,0.,-1.4502024,0.,0.,-0.1541113,0.,-0.66638,0.,-1.3845733,0.0049698,0.0742979,0.,-1.338102,0.,-2.1842532,5.012465,0.,-3.5569413,0.,-1.4501913,0.,0.,0.1541034,0.,0.6663491,0.,-1.384672,-0.0051421,0.0743025,0.,-1.3381385,0.,2.1844015,5.0123537,0.,0.0000066,0.,-3.6429553,0.,0.,0.000003,0.,0.0000328,0.,3.2924126,0.0003316,-0.2482289,0.,-2.6072943,0.,-0.0001403,-6.5239888,0.,1.2624987,0.,0.5294732,0.,0.,0.3776435,0.,7.3295327,0.,3.1936329,0.6061827,0.2683883,0.,2.9080557,0.,-0.8492683,-1.1465848,0.,-1.2624963,0.,0.529491,0.,0.,-0.3776439,0.,-7.3295345,0.,3.1936254,-0.6061293,0.2683891,0.,2.9080618,0.,0.8492736,-1.1466962,0.,1.0968965,0.,-0.6705655,0.,0.,0.3540965,0.,8.2498607,0.,-3.6625353,1.9793523,-0.1821535,0.,-2.862452,0.,-0.8278883,2.6056447,0.,-1.096896,0.,-0.6705598,0.,0.,-0.3540979,0.,-8.2498588,0.,-3.6625575,-1.9793798,-0.1821542,0.,-2.8624402,0.,0.8278762,2.6056261,0.,0.000006,0.,-1.4523083,0.,0.,0.,0.0000002,0.,-1.4196041,-0.0001518,-0.4663501,0.,-0.273447,0.,0.0000365,-2.6564776,0.,-0.0000004,0.,2.4514411,0.,0.,0.0000003,0.,0.0000005,0.,2.2615916,0.000008,0.1080223,0.,0.4911096,0.,0.0000077,2.6500587\HyperPolar=0.,0.0000077,0.,-0.0000066,-3.588067,0.,-37.3503236,0.,-0.0002267,1026.6847802\PG=C02V [C2(H1C1N1C11)],

SGV(C4H4)]\NImag=0\0.11468143,0.,0.75408512,0.,-0.00000002,0.51040968  
,-0.08226062,0.,0.,0.19524690,0.,-0.32821716,0.14336745,0.,0.85578808,  
0.,0.06083690,-0.23308354,0.,0.05747303,0.78640245,-0.08226061,0.,0.,0  
.00412113,0.,0.,0.19524690,0.,-0.32821715,-0.14336744,0.,-0.11644623,0  
.05711018,0.,0.85578808,0.,-0.06083689,-0.23308354,0.,-0.05711018,0.11  
301429,0.,-0.05747303,0.78640245,0.02646687,0.,0.,-0.08430616,0.,0.,-0  
.01149588,0.,0.,0.15722960,0.,0.05801257,0.04052931,0.,-0.17640145,0.0  
5785368,0.,-0.03536878,-0.04485738,0.,0.84582066,0.,0.15465614,-0.0283  
3419,0.,-0.06089288,-0.35876564,0.,-0.07011434,-0.10133376,0.,-0.05038  
284,0.76645471,0.02646688,0.,0.,-0.01149588,0.,0.,-0.08430616,0.,0.,0.  
00786814,0.,0.,0.15722960,0.,0.05801260,-0.04052932,0.,-0.03536878,0.0  
4485738,0.,-0.17640145,-0.05785368,0.,-0.06432406,-0.03894196,0.,0.845  
82066,0.,-0.15465614,-0.02833418,0.,0.07011434,-0.10133376,0.,0.060892  
88,-0.35876564,0.,0.03894196,0.11337993,0.,0.05038284,0.76645471,-0.01  
116490,0.,0.,0.00850857,0.,0.,0.00850858,0.,0.,-0.07710047,0.,0.,-0.07  
710049,0.,0.,0.17628037,0.,-0.14454949,0.,0.,0.07865586,-0.12633144,0.  
0.07865587,0.12633146,0.,-0.32520483,-0.03920431,0.,-0.32520482,0.039  
20430,0.,0.75050202,0.,0.00000003,0.00296676,0.,-0.03735092,-0.0261742  
4,0.,0.03735090,-0.02617423,0.,-0.14487462,-0.22486368,0.,0.14487470,-  
0.22486375,0.,0.,0.86235581,-0.00316751,0.,0.,-0.05354284,0.,0.,0.0120  
7644,0.,0.,0.00906922,0.,0.,0.00005554,0.,0.,0.00855873,0.,0.,0.033657  
34,0.,-0.03572788,-0.01168392,0.,-0.27430059,-0.14350884,0.,-0.0025381  
4,0.00386877,0.,0.00694479,0.00326056,0.,0.00013913,-0.00001534,0.,0.0  
0085170,0.00105155,0.,0.30474365,0.,0.02287525,0.01752628,0.,-0.147678  
12,-0.17440949,0.,0.00463229,-0.00014945,0.,-0.03127518,-0.01069662,0.  
0.00118045,-0.00016025,0.,0.00168792,-0.00712323,0.,0.14890946,0.1743  
3769,-0.00316751,0.,0.,0.01207644,0.,0.,-0.05354284,0.,0.,0.00005554,0  
.,0.,0.00906922,0.,0.,0.00855872,0.,0.,0.00003161,0.,0.,0.03365734,0.,  
-0.03572790,0.01168392,0.,-0.00253814,-0.00386877,0.,-0.27430059,0.143  
50884,0.,0.00013913,0.00001534,0.,0.00694479,-0.00326056,0.,0.00085169  
,-0.00105158,0.,-0.00105830,0.00068090,0.,0.30474365,0.,-0.02287522,0.  
01752628,0.,-0.00463229,-0.00014945,0.,0.14767812,-0.17440949,0.,-0.00  
118045,-0.00016025,0.,0.03127518,-0.01069662,0.,-0.00168792,-0.0071231  
8,0.,-0.00068090,0.00041628,0.,-0.14890946,0.17433769,0.00927002,0.,0.  
0.00161643,0.,0.,-0.00008883,0.,0.,-0.04423297,0.,0.,0.00891249,0.,0.  
0.00390455,0.,0.,-0.00404184,0.,0.,-0.00178928,0.,0.,0.03108541,0.,0.  
00194947,-0.00030838,0.,0.00467152,-0.00266339,0.,0.00018692,-0.001165  
05,0.,-0.31508748,0.12917819,0.,-0.00337332,-0.00454887,0.,-0.01939388  
0.01786075,0.,0.00063759,0.00071379,0.,0.00002877,0.00009433,0.,0.330  
23576,0.,0.00101217,-0.00856657,0.,0.03554060,-0.00616607,0.,-0.002103  
78,-0.00136763,0.,0.12835574,-0.14283185,0.,-0.00410534,-0.00158583,0.  
,-0.01855148,0.01606200,0.,-0.00078647,0.00073995,0.,0.00021052,0.0001  
4239,0.,-0.13957537,0.14165263,0.00926999,0.,0.,-0.00008883,0.,0.,0.00  
161643,0.,0.,0.00891249,0.,0.,-0.04423297,0.,0.,0.00390455,0.,0.,-0.00  
178928,0.,0.,-0.00404184,0.,0.,0.00026665,0.,0.,0.03108541,0.,0.001949  
46,0.00030838,0.,0.00018692,0.00116505,0.,0.00467152,0.00266339,0.,-0.  
00337332,0.00454887,0.,-0.31508748,-0.12917819,0.,-0.01939388,-0.01786  
080,0.,0.00002877,-0.00009433,0.,0.00063759,-0.00071379,0.,-0.00099449  
,-0.00094010,0.,0.33023576,0.,-0.00101219,-0.00856656,0.,0.00210378,-0  
.00136763,0.,-0.03554060,-0.00616607,0.,0.00410534,-0.00158583,0.,-0.1  
2835574,-0.14283185,0.,0.01855148,0.01606195,0.,-0.00021052,0.00014239  
0.,0.00078647,0.00073995,0.,0.00094010,0.00063229,0.,0.13957537,0.141  
65263,-0.00380821,0.,0.,0.01009783,0.,0.,0.01009783,0.,0.,0.00734338,0  
.,0.,0.00734339,0.,0.,-0.05283287,0.,0.,-0.00077068,0.,0.,-0.00077067,  
0.,0.,-0.00491099,0.,0.,-0.00491099,0.,0.,0.03316289,0.,-0.00088455,0.  
0.,-0.00603637,-0.00335639,0.,-0.00603637,0.00335639,0.,0.00878333,-0  
.03222547,0.,0.00878333,0.03222547,0.,-0.07565907,0.,0.,0.00020680,-0.  
00165998,0.,0.00020680,0.00165998,0.,0.00113466,0.00093486,0.,0.001134  
66,-0.00093486,0.,0.06835247,0.,0.,0.00056637,0.,-0.00371346,0.0005758  
4,0.,0.00371346,0.00057584,0.,0.00332594,-0.01153773,0.,-0.00332594,-0  
.01153773,0.,0.,-0.38102358,0.,0.00023296,-0.00073780,0.,-0.00023296,-  
0.00073780,0.,-0.00046896,0.00095531,0.,0.00046896,0.00095531,0.,0.,0.  
40185149,-0.00032581,0.,0.,0.00002704,0.,0.,0.00002703,0.,0.,0.0001902

4,0.,0.,0.00019022,0.,0.,-0.00002534,0.,0.,-0.00013674,0.,0.,-0.00013674,0.,0.,0.00000836,0.,0.,0.00000839,0.,0.,-0.00004092,0.,0.,0.00021427,0.,-0.00068515,0.00000001,0.,0.00000635,0.00043264,0.,0.00000634,-0.00043263,0.,0.00005933,0.00010261,0.,0.00005933,-0.00010262,0.,-0.0001117,0.,0.,0.00007253,0.00002761,0.,0.00007255,-0.00002763,0.,0.00000455,0.00000857,0.,0.00000455,-0.00000856,0.,0.00001432,0.,0.,0.00049649,0.,-0.00000002,-0.00902678,0.,0.00277866,0.00145724,0.,-0.00277866,0.00145724,0.,-0.00054149,0.00027490,0.,0.00054144,0.00027494,0.,0.,-0.0010063,0.,-0.00043732,0.00011425,0.,0.00043734,0.00011421,0.,-0.00005714,0.00033339,0.,0.00005718,0.00033343,0.,0.,0.00009448,0.,0.,0.00467333\\0.,0.,0.00012917,0.,0.00001070,-0.00000019,0.,-0.00001070,-0.00000019,0.,-0.00006894,-0.00006928,0.,0.00006894,-0.00006928,0.,0.,-0.00008565,0.,-0.00002510,0.00003628,0.,0.00002510,0.00003628,0.,0.00000775,0.00001372,0.,-0.00000775,0.00001372,0.,0.,0.00000096,0.,0.,-0.00000533\\\\@

1\\1\GINC-RSCQC9\FOpt\UMP2-FU\6-31G(d)\C5H5Cl1N1(2)\AXN501\19-Jan-1996\0\\# UMP2=FULL/6-31G\* SCF=DIRECT FOPT MAXDISK=920000000\\c1-pyridine structure\\0,2\N,-0.3058369725,0.,0.\C,0.3632472034,1.162218664,0.\C,0.3632472034,-1.162218664,0.\C,1.7606732106,1.2027777849,0.\C,1.7606732106,-1.2027777849,0.\C,2.4716782962,0.,0.\H,-0.2450353692,2.0623723841,0.\H,-0.2450353692,-2.0623723841,0.\H,2.2744610899,2.1593910229,0.\H,2.2744610899,-2.1593910229,0.\H,3.5579856426,0.,0.\Cl,-2.6937113542,0.,0.\\Version=IBM-RS6000-G94RevC.2\State=2-A1\HF=-706.1422858\MP2=-707.0880065\PUHF=-706.1464965\PMP2-0=-707.091125\S2=0.774\S2-1=0.762\S2A=0.751\RMSD=9.657e-09\RMSF=2.750e-05\Dipole=2.0954325,0.,0.\PG=C02V [C2(H1C1N1C11),SGV(C4H4)]\\@

#### MeNH-CH<sub>2</sub> (15)

1\\1\GINC-RSCQC9\FOpt\UMP2-FU\6-31G(d)\C2H6N1(2)\AXN501\15-Nov-1995\1\\# MP2=FULL/6-31G(D) FOPT=Z-MATRIX SCF=DIRECT GEOM=CHECK\\CH3-N(H)=CH2 2c-2e, C1 structure (15)\\0,2\C\N,1,r1\H,2,r2,1,a1\H,1,r3,2,a2,3,aa1,0\H,1,r4,2,a3,3,aa2,0\C,2,r5,1,a4,3,aa3,0\H,6,r6,2,a5,1,aa4,0\H,6,r7,2,a6,1,aa5,0\H,6,r8,2,a7,1,aa6,0\\r1=1.392451\r2=1.01458455\r3=1.08360617\r4=1.08448718\r5=1.45383066\r6=1.09255983\r7=1.09184854\r8=1.09821327\aa1=112.93244707\aa2=115.65839059\aa3=115.23232847\aa4=117.11805974\aa5=108.56629122\aa6=109.37118229\aa7=113.40551413\aa1=40.6658715\aa2=182.94835315\aa3=133.22514696\aa4=56.87010902\aa5=174.62629352\aa6=296.56676185\\Version=IBM-RS6000-G94RevC.2\HF=-133.6146869\MP2=-134.0316485\PUHF=-133.6175527\PMP2-0=-134.0333641\S2=0.76\S2-1=0.752\S2A=0.75\RMSD=9.155e-09\RMSF=3.131e-05\Dipole=0.1141626,0.1794633,0.3575886\PG=C01 [X(C2H6N1)]\\@

#### MeCH<sub>2</sub>-NH (16)

1\\1\GINC-RSCQC2\FOpt\UMP2-FU\6-31G(d)\C2H6N1(2)\AXN501\18-Jan-1996\1\\# UMP2=(FULL)/6-31G\* FOPT=Z-MATRIX\\HN-ch2ch3 ncf structure for aces2\\0,2\C\C,1,r1\N,2,r2,1,a1\H,3,r3,2,a2,1,180.,0\H,1,r4,2,a3,3,180.,0\H,1,r5,2,a4,3,aa1,0\H,1,r5,2,a4,3,-aa1,0\H,2,r6,1,a5,3,aa2,0\H,2,r6,1,a5,3,-aa2,0\\r1=1.51824125\r2=1.44929073\r3=1.02917917\r4=1.09338533\r5=1.09193823\r6=1.10170394\aa1=110.81412632\aa2=106.62818383\aa3=111.08541072\aa4=110.16929665\aa5=110.56259115\aa1=59.5723515\aa2=121.73224733\\Version=IBM-RS6000-G94RevC.2\State=2-A\HF=-133.6295291\MP2=-134.0343527\PUHF=-133.6329226\PMP2-0=-134.0364505\S2=0.76\S2-1=0.752\S2A=0.75\RMSD=8.335e-09\RMSF=7.662e-05\Dipole=-0.6619608,0.,0.3557218\PG=CS [SG(C2H2N1),X(H4)]\\@

#### N-Methylpyridinyl (17)

1\\1\GINC-EIGEN\FOpt\UMP2-FU\6-31G(d)\C6H8N1(2)\AXN501\30-Jan-1996\0\\# UMP2=FULL/6-31G\* FOPT\\N-methyl-pyridine, 2A', (me17b), structure\\0,2\N,-0.8955175716,0.,0.0299426435\C,-0.1792214197,1.1916512625,0.0338685427\C,-0.1792214197,-1.1916512625,0.0338685427\C,1.1575840047,1.2001912789,0.1271348992\C,1.1575840047,-1.2001912789,0.1271348992\C,1.9040

860171,0.,0.1853546201\H,-0.7798677067,2.0930622849,-0.0080581478\H,-0.7798677067,-2.0930622849,-0.0080581478\H,1.6599479989,2.1623436139,0.157268397\H,1.6599479989,-2.1623436139,0.157268397\H,2.9838912353,0.,0.2464702545\C,-2.2829871409,0.,-0.3896533204\H,-2.3827080897,0.,-1.4826210542\H,-2.779832503,-0.8858147459,0.0109413477\H,-2.779832503,0.8858147459,0.0109413477\\Version=IBM-RS6000-G94RevC.2\State=2-A'\HF=-286.2662206\MP2=-287.1820253\PUHF=-286.2886971\PMP2-0=-287.20156\S2=1.049\S2-1=0.962\S2A=0.807\RMSD=9.227e-09\RMSF=1.467e-05\Dipole=-0.8583896,0.,-0.1835908\PG=CS [SG(C2H2N1),X(C4H6)]\\@

#### 4-Methylpyridinyl (18)

1\1\GINC-PC\FOpt\UMP2-FU\6-31G(d)\C6H8N1(2)\AXN501\25-Jan-1996\0\\# UMP2=FULL/6-31G\* FOPT SCF=DIRECT\\4-me-pyridine (me18), 2A', structure\\0,2\N,-0.2237860171,-1.8670738956,0.\C,-0.2282022017,-1.1439413854,1.1523073288\C,-0.2282022017,-1.1439413854,-1.1523073288\C,-0.2282022017,0.1990506923,1.2230566303\C,-0.2282022017,0.1990506923,-1.2230566303\C,-0.19585382,1.0502311509,0.\H,-0.2337235444,-1.7400643915,2.0616581877\H,-0.2337235444,-1.7400643915,-2.0616581877\H,-0.2275279198,0.6923813375,2.1914902327\H,-0.2275279198,0.6923813375,-2.1914902327\H,-1.0842645232,1.7068673678,0.\C,1.0350013555,1.9790650343,0.\H,1.9503537554,1.3835110407,0.\H,1.0324417214,2.6187080874,-0.8871527543\H,1.0324417214,2.6187080874,0.8871527543\\Version=SGI-G94RevC.3\State=2-A'\HF=-286.2763202\MP2=-287.1744411\PUHF=-286.3075083\PMP2-0=-287.2020717\S2=1.167\S2-1=1.056\S2A=0.862\RMSD=8.004e-09\RMSF=1.041e-04\Dipole=1.1094638,0.,0.053451\PG=CS [SG(C2H2N1),X(C4H6)]\\@
